# Supplementary material for: Size-controlled antimicrobial peptide drug delivery vehicles through complex coacervation
Source: Royal Society of Chemistry journal article supplement (doi:10.1039/d4sm01157k), 2024-12-23
Supplement: d4sm01157k1.pdf [file d4sm01157k1.pdf]

## Supporting Information for

# Size-Controlled Antimicrobial Peptide Drug Delivery Vehicles through Complex Coacervation

*Thomas D. Vogelaar<sup>1</sup>, Henrik Torjusen<sup>1</sup>, and Reidar Lund<sup>1,2\*</sup>*

<sup>1</sup>Department of Chemistry, University of Oslo, P.O. Box 1033 Blindern, NO-0315 Oslo,  
Norway

<sup>2</sup>Hylleraas Centre for Quantum Molecular Sciences, University of Oslo, NO-0315 Oslo,  
Norway

# Table of Contents

1. SAXS form and structure factors for the fuzzy-surface complex coacervate model
2. Results and Discussion
  - 2.1. SAXS fitting parameters of the binary polymer-colistin C3Ms
  - 2.2. Swelling ternary coacervate systems
  - 2.3. Formation kinetics of ternary coacervate systems
3. References

# 1. SAXS form and structure factors for the fuzzy-surface complex coacervate model

## 1.1. Structure factors

In the case of micellar clusters, a structure factor is used to explain the scattering at low Q. The structure factor,  $S(Q)_{cluster}$ , is described by the following equations<sup>1</sup> (Equation S1-S6).

$$p = N_{clu} - \text{floor}(N_{clu}) \quad (\text{S1})$$

$$D = 2 \cdot R_{tot} \cdot f_{dist} \quad (\text{S2})$$

$$S_x = \frac{\sin(Q \cdot D)}{Q \cdot D} \quad (\text{S3})$$

$$S_n = \frac{2}{1 - S_x} - 1 - \frac{2 \left(1 - S_x^{\text{floor}(N_{clu})}\right) \cdot S_x}{\text{floor}(N_{clu}) \cdot (1 - S_x)^2} \quad (\text{S4})$$

$$S_{n1} = \frac{2}{1 - S_x} - 1 - \frac{2 \left(1 - S_x^{(\text{floor}(N_{clu}) + 1)}\right) \cdot S_x}{(\text{floor}(N_{clu}) + 1) \cdot (1 - S_x)^2} \quad (\text{S5})$$

$$S(Q)_{cluster} = (1 - p) \cdot S_n + p \cdot S_{n1} \quad (\text{S6})$$

In which  $N_{clu}$  is the number of cluster units, and  $f_{dist}$  is the distance correlation of the clusters. To describe the correlation peak at high Q values caused by polyelectrolyte charge correlations in the core of the C3Ms, a pseudo-structure factor is introduced ( $S(Q)_{internal}$ ) (Equation S7).<sup>2,3</sup>

$$S(Q)_{internal} = \frac{|C(Q)| \cdot e^{-\frac{(Q - Q_{local})^2}{2 \cdot (W \cdot Q_{local})^2}}}{W \cdot Q_{local} \cdot \sqrt{2\pi}} \quad (\text{S7})$$

In which  $C(Q)$  is the fractal scattering,  $Q_{local}$  is the structure peak position, and  $W$  is the relative width of the local Q.

## 1.2. Form factors

To describe the fuzzy-surface complex coacervate micelle, a form factor for fuzzy spheres was used ( $P_{Coa}(Q)$ ) (Equation S8-S12).<sup>4,5</sup>

$$F_0 = \left( \frac{R_{in}}{\sigma_{in}^2} + \frac{1}{\sigma_{in}} \right) \cdot \frac{\cos(Q \cdot (R_{in} + \sigma_{in}))}{Q^4} - \frac{3 \cdot \sin(Q \cdot (R_{in} + \sigma_{in}))}{Q^5 \cdot \sigma_{in}^2} + \left( \frac{R_{in}}{\sigma_{in}^2} + \frac{1}{\sigma_{in}} \right) \cdot \frac{\cos(Q \cdot (R_{in} - \sigma_{in}))}{Q^4} \quad (S8)$$

$$F_1 = \frac{-3 \cdot \sin(Q \cdot (R_{in} + \sigma_{in})) + 6 \cdot \sin(Q \cdot R_{in})}{Q^5 \cdot \sigma_{in}^2} - \frac{2 \cdot R_{in} \cdot \cos(Q \cdot R_{in})}{Q^4 \cdot \sigma_{in}^2} \quad (S9)$$

$$V_n = \frac{R_{in}^3}{3} + \frac{R_{in} \cdot \sigma_{in}^2}{6} \quad (S10)$$

$$A_{core}(Q) = \frac{F_0 + F_1}{V_n} \quad (S11)$$

$$P_{Coa}(Q) = A_{core}(Q)^2 \quad (S12)$$

The form factor includes spheres with graded interfaces described by the radius  $R_{in}$  and width of the interface,  $\sigma_{in}$ .  $A_{core}(Q)$  is the scattering amplitude of the fuzzy core, which, to obtain the form factor, is squared. Lastly, the Debye form factor for polymers and polyelectrolytes ( $P_{Debye}(Q)$ ) is given in Equation S13.<sup>6</sup>

$$P_{Debye}(Q) = \frac{2(e^{-Q^2 \cdot R_g^2} - 1 + Q^2 \cdot R_g^2)}{(Q^2 \cdot R_g^2)^2} \quad (S13)$$

In which the  $R_g$  is the radius of gyration of the polymer/polyelectrolyte. From the fits, we can calculate some of the features of the C3Ms. We start with the average molecular weight of the complex coacervate micelle ( $M_w$ ) in Equation S14.

$$M_w = P \cdot \left( f_{mix0poly1} \cdot (M_{PMAA_1} + M_{PEO_1}) + f_{mix0poly2} \cdot (M_{PMAA_2} + M_{PEO_2}) \right) + (1 - P) \cdot (M_{PMAA} + M_{PEO}) \quad (S14)$$

Where P is the aggregation number (number of chains per micelle),  $f_{mix0poly1}$  is the molar fraction of polymer 1 in the micelles,  $M_{PMAA1}$  is the molecular weight of the PMAA block of polymer

1,  $M_{PEO1}$  is the molecular weight of the PEO block of polymer 1,  $f_{mix0poly2}$  is the molar fraction of polymer 2 in the micelles,  $M_{PMAA2}$  is the molecular weight of the PMAA block of polymer 2,  $M_{PEO2}$  is the molecular weight of the PEO block of polymer 2,  $f_{mix0}$  is the total molar fraction of polymer in the micelles,  $M_{Col0}$  is the molecular weight of colistin without the sulfate salt. Furthermore, we can also calculate the fraction of water inside the core with the following equations (S15-S17). We start with the dry volumes of the PMAA and colistin core ( $V_{cp}$ ), PEO ( $V_{sp}$ ) and the total dry volume ( $V_{tot}$ ):

$$V_{cp} = \frac{(1 - f_{mix0}) \cdot \frac{M_{Col0}}{d_{Col}} + f_{mix0poly1} \cdot \frac{M_{PMAA1}}{d_{PMAA}} + f_{mix0poly2} \cdot \frac{M_{PMAA2}}{d_{PMAA}}}{N_A} \quad (S15)$$

$$V_{sp} = \frac{f_{mix0poly1} \cdot \frac{M_{PEO1}}{d_{PEO}} + f_{mix0poly2} \cdot \frac{M_{PEO2}}{d_{PEO}}}{N_A} \quad (S16)$$

$$V_{tot} = V_{cp} + V_{sp} \quad (S17)$$

Where  $d_{Col}$  is the density of colistin,  $d_{PMAA}$  is the density of the PMAA block,  $d_{PEO}$  is the density of the PEO block, and  $N_A$  is Avogadro's number. Now we can calculate the wet volume of the micelle and determine the water fraction in the micelle through Equations S18 and S19.

$$V_c = 4\pi \cdot \left( \frac{R_{in}}{3} + \frac{R_{in} \cdot \sigma_{in}^2}{6} \right) \quad (S18)$$

$$f_w = 1 - \left( \frac{V_{tot}}{V_c} \right) \quad (S19)$$

Where  $R_{in}$  is the core radius of the micelle and  $\sigma_{in}$  is its density distribution, both obtained from the fits. For a more detailed explanation of the model features and mass balance calculations, we refer to a previous publication.<sup>3</sup> A summary of the parameters used and their categorisation (fixed, calculated, experimental, or fitting parameters) is given in Table S1.

**Table S1.** Summary of parameters used in the fitting model.

| Model parameters / $f_+$                   | Category   | Values for fixed parameters | Description                       |
|--------------------------------------------|------------|-----------------------------|-----------------------------------|
| $M_{Col}$ (Da)                             | Fixed      | 1405.65                     | Molecular weight colistin sulfate |
| $\Delta\rho_{Col}$ (cm <sup>-2</sup> )     | Fixed      | $1.24 \cdot 10^{11}$        | SLD colistin                      |
| $\Delta\rho_{PMAA}$ (cm <sup>-2</sup> )    | Fixed      | $1.09 \cdot 10^{11}$        | SLD colistin                      |
| $\Delta\rho_{PEO}$ (cm <sup>-2</sup> )     | Fixed      | $1.11 \cdot 10^{11}$        | SLD PEO block                     |
| $\Delta\rho_{Core}$ (cm <sup>-2</sup> )    | Calculated |                             | SLD average in core               |
| $\Delta\rho_{Solvent}$ (cm <sup>-2</sup> ) | Fixed      | $9.43 \cdot 10^{10}$        | SLD solvent buffer                |

|                                  |                                          |                            |                                                                  |
|----------------------------------|------------------------------------------|----------------------------|------------------------------------------------------------------|
| $f_{mix0}$ (-)                   | Fixed                                    | 0.09296 or 0.05076         | Total molar polymer fraction in C3M                              |
| $f_{mix0poly1}$ (-)              | Calculated                               |                            | Molar polymer 1 fraction in C3M                                  |
| $f_{mix0poly2}$ (-)              | Calculated                               |                            | Molar polymer 1 fraction in C3M                                  |
| $c_{Poly1,2}$ (mg/mL)            | Experimental                             |                            | Concentrations of polymer 1 and 2                                |
| $c_{Col}$ (mg/mL)                | Experimental                             |                            | Concentration of colistin                                        |
| $\phi$ (-)                       | Calculated                               |                            | Volume fraction (from concentrations)                            |
| $P$ (-)                          | Fitting parameter                        |                            | Aggregation number                                               |
| $\sigma_{in}$ (nm)               | Fitting parameter                        |                            | Density distribution of radius                                   |
| $R_{in}$ (nm)                    | Fitting parameter                        |                            | Core radius of micelle                                           |
| $d_{Col}$ (g cm <sup>-3</sup> )  | Fixed                                    | 1.35                       | Density colistin                                                 |
| $d_{PEO}$ (g cm <sup>-3</sup> )  | Fixed                                    | 1.20                       | Density PEO block                                                |
| $d_{PMAA}$ (g cm <sup>-3</sup> ) | Fixed                                    | 1.20                       | Density PMAA block                                               |
| $M_{PEO1,2}$ (Da)                | Fixed                                    | Depending on polymer       | Molecular weight PEO blocks                                      |
| $M_{PMAA1,2}$ (Da)               | Fixed                                    | Depending on polymer       | Molecular weight PMAA blocks                                     |
| $R_{tot}$ (nm)                   | Calculated                               |                            | Total radius of micelle                                          |
| $f_{coa}$ (-)                    | Calculated                               |                            | Fraction of material forming coacervates                         |
| $R_{g,Col}$ (nm)                 | Fixed                                    | 0.64                       | Radius of free colistin molecules                                |
| $R_{g,Poly}$ (nm)                | Fixed                                    | Polymer sizes from Table 1 | Radius of free polymer molecules                                 |
| $f_{clu}$ (-)                    | Fitting parameter if necessary (cluster) |                            | Fraction of clusters                                             |
| $N_{clu}$ (-)                    | Fitting parameter if necessary (cluster) |                            | Number of micelles per cluster                                   |
| $f_{dist}$ (-)                   | Fitting parameter if necessary (cluster) |                            | Distance between clusters                                        |
| $C(Q)$ (-)                       | Fitting parameter                        |                            | Fractal scattering of the internal structure                     |
| $f_{blob}$ (-)                   | Fitting parameter                        |                            | Fraction of blob scattering                                      |
| $\xi$ (-)                        | Fitting parameter                        |                            | Blob correlation length                                          |
| $W$ (-)                          | Fitting parameter                        |                            | Width of the internal structure peak                             |
| $Q_{locat}$ (Å <sup>-1</sup> )   | Fitting parameter                        |                            | Q position of the internal structure peak                        |
| $M_{Col0}$ (Da)                  | Fixed                                    | 1165.5                     | Salt-free molecular weight colistin                              |
| $f_{Col}$ (-)                    | Fitting parameter                        |                            | Fraction of colistin in aqueous phase                            |
| $f_{Poly}$ (-)                   | Calculated                               |                            | Fraction of polymers in aqueous phase                            |
| $f_{mix}$ (-)                    | Calculated                               |                            | Molar fraction of polymers in aqueous phase                      |
| $M_w$ (Da)                       | Calculated                               |                            | Total molecular weight average of one complex coacervate micelle |
| $c_{ColC3M}$ (mg/mL)             | Calculated                               |                            | Encapsulation concentration of colistin                          |
| $f_w$ (-)                        | Calculated                               |                            | Water fraction in the micelle                                    |
| $PDI$ (%)                        | Fitting parameter                        |                            | Polydispersity of the radius                                     |

## 2. Results and Discussion

### 2.1. SAXS fitting parameters of the binary polymer-colistin C3Ms

In Table S2, S3, and S4, the final states of the three different PEO-b-PMAA-colistin C3Ms are compared at 0.50 wt%, 0.25 wt% and 0.125 wt%, respectively.

**Table S2.** The most important fit parameters for PEO<sub>45</sub>-b-PMAA<sub>41</sub>-colistin C3Ms at 0.50 wt%, 0.25 wt% and 0.125 wt% were obtained from the fuzzy-surface complex coacervate model.

| Model parameters / $f_+$                   | 0.50 wt%             | 0.25 wt%             | 0.125 wt%            |
|--------------------------------------------|----------------------|----------------------|----------------------|
| $M_{Col}$ (Da)                             | 1405.65              | 1405.65              | 1405.65              |
| $\Delta\rho_{Col}$ (cm <sup>-2</sup> )     | $1.24 \cdot 10^{11}$ | $1.24 \cdot 10^{11}$ | $1.24 \cdot 10^{11}$ |
| $\Delta\rho_{PMAA}$ (cm <sup>-2</sup> )    | $1.09 \cdot 10^{11}$ | $1.09 \cdot 10^{11}$ | $1.09 \cdot 10^{11}$ |
| $\Delta\rho_{PEO}$ (cm <sup>-2</sup> )     | $1.11 \cdot 10^{11}$ | $1.11 \cdot 10^{11}$ | $1.11 \cdot 10^{11}$ |
| $\Delta\rho_{Core}$ (cm <sup>-2</sup> )    | $1.24 \cdot 10^{11}$ | $1.24 \cdot 10^{11}$ | $1.24 \cdot 10^{11}$ |
| $\Delta\rho_{Solvent}$ (cm <sup>-2</sup> ) | $9.43 \cdot 10^{10}$ | $9.43 \cdot 10^{10}$ | $9.43 \cdot 10^{10}$ |
| $f_{mix0}$ (-)                             | 0.09296              | 0.09296              | 0.09296              |
| $c_{Poly}$ (mg/mL)                         | 1.62                 | 0.81                 | 0.41                 |
| $c_{Col}$ (mg/mL)                          | 3.38                 | 1.69                 | 0.84                 |
| $P$ (-)                                    | $1.4 \cdot 10^3$     | $1.6 \cdot 10^3$     | $1.2 \cdot 10^4$     |
| $\sigma_{in}$ (nm)                         | 1.8                  | 1.6                  | 1.7                  |
| $R_{in}$ (nm)                              | 13.6                 | 14.3                 | 14.0                 |

|                                   |                     |                     |                     |
|-----------------------------------|---------------------|---------------------|---------------------|
| $R_{tot}$ (nm)                    | 15.4                | 16.0                | 15.8                |
| $f_{coa}$ (-)                     | 0.84                | 0.84                | 0.84                |
| $R_{g,Col}$ (nm)                  | 0.64                | 0.64                | 0.64                |
| $R_{g,Poly}$ (nm)                 | 2.4                 | 2.4                 | 2.4                 |
| $f_{clu}$ (-)                     | 0                   | 0                   | 0                   |
| $f_{dist}$ (-)                    | 1                   | 1                   | 1                   |
| $C(Q)$ (-)                        | $5.6 \cdot 10^{-5}$ | $3.0 \cdot 10^{-5}$ | $1.1 \cdot 10^{-5}$ |
| $f_{blob}$ (-)                    | 0.38                | 0.36                | 0.44                |
| $\zeta$ (-)                       | 3.8                 | 3.3                 | 3.2                 |
| $W$ (-)                           | 0.09                | 0.10                | 0.10                |
| $Q_{local}$ ( $\text{\AA}^{-1}$ ) | 0.22                | 0.22                | 0.22                |
| $M_{Col0}$ (Da)                   | 1165.5              | 1165.5              | 1165.5              |
| $f_{Col}$ (-)                     | 0.16                | 0.16                | 0.16                |
| $f_{Poly}$ (-)                    | 0.16                | 0.16                | 0.16                |
| $f_{mix}$ (-)                     | 0.093               | 0.093               | 0.093               |
| $M_w$ (Da)                        | $2.3 \cdot 10^6$    | $2.7 \cdot 10^6$    | $2.0 \cdot 10^6$    |
| $c_{ColC3M}$ (mg/mL)              | 2.8                 | 1.4                 | 0.71                |
| $f_w$ (-)                         | 0.76                | 0.76                | 0.81                |
| $PDI$ (%)                         | 18                  | 17                  | 17                  |

**Table S3.** The most important fit parameters for PEO<sub>45</sub>-b-PMAA<sub>81</sub>-colistin C3Ms at 0.50 wt%, 0.25 wt% and 0.125 wt% were obtained from the fuzzy-surface complex coacervate model.

| Model parameters / $f_+$                   | 0.50 wt%             | 0.25 wt%             | 0.125 wt%            |
|--------------------------------------------|----------------------|----------------------|----------------------|
| $M_{Col}$ (Da)                             | 1405.65              | 1405.65              | 1405.65              |
| $\Delta\rho_{Col}$ (cm <sup>-2</sup> )     | $1.24 \cdot 10^{11}$ | $1.24 \cdot 10^{11}$ | $1.24 \cdot 10^{11}$ |
| $\Delta\rho_{PMAA}$ (cm <sup>-2</sup> )    | $1.09 \cdot 10^{11}$ | $1.09 \cdot 10^{11}$ | $1.09 \cdot 10^{11}$ |
| $\Delta\rho_{PEO}$ (cm <sup>-2</sup> )     | $1.11 \cdot 10^{11}$ | $1.11 \cdot 10^{11}$ | $1.11 \cdot 10^{11}$ |
| $\Delta\rho_{Core}$ (cm <sup>-2</sup> )    | $1.24 \cdot 10^{11}$ | $1.24 \cdot 10^{11}$ | $1.24 \cdot 10^{11}$ |
| $\Delta\rho_{Solvent}$ (cm <sup>-2</sup> ) | $9.43 \cdot 10^{10}$ | $9.43 \cdot 10^{10}$ | $9.43 \cdot 10^{10}$ |
| $f_{mix0}$ (-)                             | 0.05076              | 0.05076              | 0.05076              |
| $c_{Poly}$ (mg/mL)                         | 1.41                 | 0.71                 | 0.35                 |
| $c_{Col}$ (mg/mL)                          | 3.59                 | 1.79                 | 0.90                 |
| $P$ (-)                                    | $1.4 \cdot 10^4$     | $4.8 \cdot 10^3$     | $5.4 \cdot 10^3$     |
| $\sigma_{in}$ (nm) <sup>[a]</sup>          | 0.0                  | 0.0                  | 0.0                  |
| $R_{in}$ (nm) <sup>[a]</sup>               | 35.0                 | 30.2                 | 35.3                 |
| $R_{tot}$ (nm)                             | 35.0                 | 30.2                 | 35.3                 |
| $f_{coa}$ (-)                              | 0.84                 | 0.86                 | 0.84                 |
| $R_{g,Col}$ (nm)                           | 0.64                 | 0.64                 | 0.64                 |
| $R_{g,Poly}$ (nm)                          | 3.5                  | 3.5                  | 3.5                  |
| $f_{clu}$ (-)                              | 0.20                 | 0.30                 | 0.55                 |
| $f_{dist}$ (-)                             | 0.2                  | 0.07                 | 0.04                 |
| $C(Q)$ (-)                                 | $7.2 \cdot 10^{-5}$  | $3.2 \cdot 10^{-5}$  | $1.3 \cdot 10^{-5}$  |
| $f_{blob}$ (-)                             | 0.24                 | 0.28                 | 0.32                 |
| $\zeta$ (-)                                | 2.7                  | 2.8                  | 3.0                  |
| $W$ (-)                                    | 0.08                 | 0.07                 | 0.07                 |
| $Q_{local}$ ( $\text{\AA}^{-1}$ )          | 0.23                 | 0.23                 | 0.23                 |
| $M_{Col0}$ (Da)                            | 1165.5               | 1165.5               | 1165.5               |
| $f_{Col}$ (-)                              | 0.15                 | 0.14                 | 0.16                 |
| $f_{Poly}$ (-)                             | 0.15                 | 0.14                 | 0.16                 |
| $f_{mix}$ (-)                              | 0.051                | 0.051                | 0.051                |
| $M_w$ (Da)                                 | $2.2 \cdot 10^7$     | $7.8 \cdot 10^6$     | $8.8 \cdot 10^6$     |
| $c_{ColC3M}$ (mg/mL)                       | 3.0                  | 1.5                  | 0.75                 |
| $f_w$ (-)                                  | 0.84                 | 0.91                 | 0.94                 |
| $PDI$ (%)                                  | 22                   | 22                   | 21                   |

<sup>[a]</sup> It was not possible to extract a reliable width parameter for these systems, most likely due to the increased polydispersity. The size is still extracted well based on the  $R_m$  parameter.

**Table S4.** The most important fit parameters for PEO<sub>114</sub>-b-PMAA<sub>81</sub>-colistin C3Ms at 0.50 wt%, 0.25 wt% and 0.125 wt% were obtained from the fuzzy-surface complex coacervate model.

| Model parameters / $f_+$                   | 0.50 wt%             | 0.25 wt%             | 0.125 wt%            |
|--------------------------------------------|----------------------|----------------------|----------------------|
| $M_{Col}$ (Da)                             | 1405.65              | 1405.65              | 1405.65              |
| $\Delta\rho_{Col}$ (cm <sup>-2</sup> )     | $1.24 \cdot 10^{11}$ | $1.24 \cdot 10^{11}$ | $1.24 \cdot 10^{11}$ |
| $\Delta\rho_{PMAA}$ (cm <sup>-2</sup> )    | $1.09 \cdot 10^{11}$ | $1.09 \cdot 10^{11}$ | $1.09 \cdot 10^{11}$ |
| $\Delta\rho_{PEO}$ (cm <sup>-2</sup> )     | $1.11 \cdot 10^{11}$ | $1.11 \cdot 10^{11}$ | $1.11 \cdot 10^{11}$ |
| $\Delta\rho_{Core}$ (cm <sup>-2</sup> )    | $1.24 \cdot 10^{11}$ | $1.24 \cdot 10^{11}$ | $1.24 \cdot 10^{11}$ |
| $\Delta\rho_{Solvent}$ (cm <sup>-2</sup> ) | $9.43 \cdot 10^{10}$ | $9.43 \cdot 10^{10}$ | $9.43 \cdot 10^{10}$ |
| $f_{mix0}$ (-)                             | 0.05076              | 0.05076              | 0.05076              |
| $c_{Poly}$ (mg/mL)                         | 1.73                 | 0.86                 | 0.43                 |
| $c_{Col}$ (mg/mL)                          | 3.27                 | 1.64                 | 0.82                 |
| $P$ (-)                                    | $1.5 \cdot 10^4$     | $1.6 \cdot 10^4$     | $1.0 \cdot 10^4$     |
| $\sigma_{in}$ (nm) <sup>[a]</sup>          | 0.0                  | 0.0                  | 0.0                  |
| $R_{in}$ (nm) <sup>[a]</sup>               | 36.8                 | 35.1                 | 30.6                 |
| $R_{tot}$ (nm)                             | 36.8                 | 35.1                 | 30.6                 |
| $f_{coa}$ (-)                              | 0.87                 | 0.86                 | 0.84                 |
| $R_{g,Col}$ (nm)                           | 0.64                 | 0.64                 | 0.64                 |
| $R_{g,Poly}$ (nm)                          | 3.5                  | 3.5                  | 3.5                  |
| $f_{clu}$ (-)                              | 0                    | 0                    | 0                    |
| $f_{dist}$ (-)                             | 1                    | 1                    | 1                    |
| $C(Q)$ (-)                                 | $9.1 \cdot 10^{-5}$  | $3.8 \cdot 10^{-5}$  | $1.9 \cdot 10^{-5}$  |
| $f_{blob}$ (-)                             | 0.22                 | 0.20                 | 0.24                 |
| $\zeta$ (-)                                | 2.0                  | 1.5                  | 1.3                  |
| $W$ (-)                                    | 0.09                 | 0.09                 | 0.10                 |
| $Q_{local}$ (Å <sup>-1</sup> )             | 0.23                 | 0.23                 | 0.22                 |
| $M_{Col0}$ (Da)                            | 1165.5               | 1165.5               | 1165.5               |
| $f_{Col}$ (-)                              | 0.09                 | 0.14                 | 0.16                 |
| $f_{Poly}$ (-)                             | 0.09                 | 0.14                 | 0.16                 |
| $f_{mix}$ (-)                              | 0.051                | 0.051                | 0.051                |
| $M_w$ (Da)                                 | $2.7 \cdot 10^7$     | $2.8 \cdot 10^7$     | $1.9 \cdot 10^7$     |
| $c_{ColC3M}$ (mg/mL)                       | 2.9                  | 1.4                  | 0.68                 |
| $f_w$ (-)                                  | 0.89                 | 0.80                 | 0.78                 |
| $PDI$ (%)                                  | 22                   | 19                   | 14                   |

<sup>[a]</sup> It was not possible to extract a reliable width parameter for these systems, most likely due to the increased polydispersity. The size is still extracted well based on the  $R_m$  parameter.

## 2.2. Swelling ternary coacervate systems



In Figure S1, the SAXS patterns and fits of the ternary complex coacervate systems T5, T6, T7, and T8 are shown at 0.125 wt%, including their  $R_{tot}$  fit parameter (from the fuzzy-surface complex coacervate model) for the complete polymer molar fraction set ( $0 \leq \Psi \leq 1$ ). In Figure S2, T3 and T4 ternary coacervate systems are shown to not swell at the complete polymer molar fraction set based on the fits from the fuzzy-surface complex coacervate model. Lastly, in Figure S3, the  $PDI$  behaviour (from the fuzzy-surface complex coacervate model) for the complete polymer molar fraction set is shown for T5, T6, T7, and T8 complex coacervate systems.

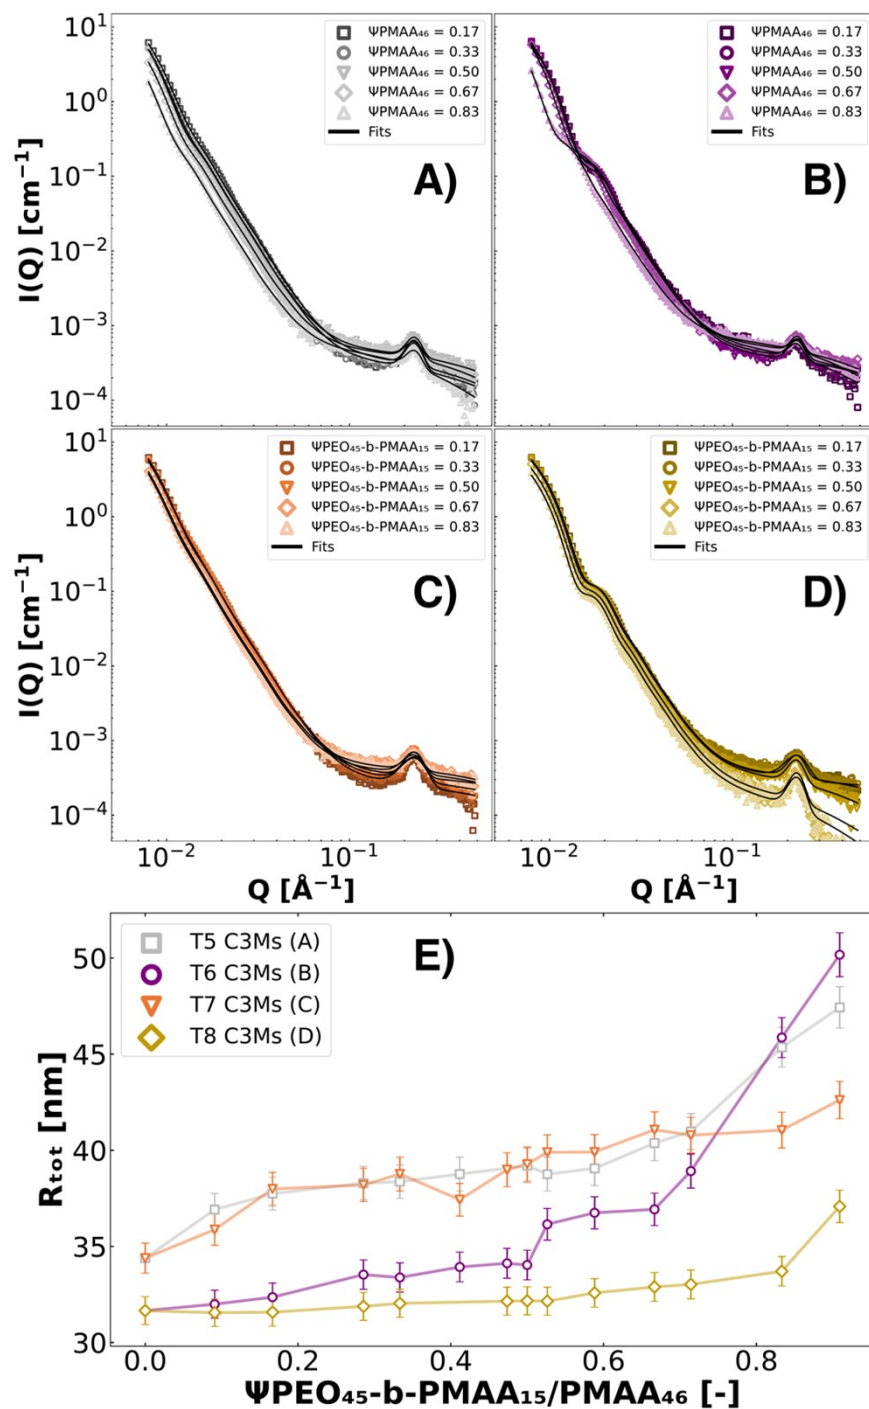

**Figure S1.** SAXS patterns of colistin-C3Ms formed from four different ternary coacervate formulations at 0.125 wt%. C3Ms were prepared from a combination of colistin and two other polymers: PMAA<sub>46</sub>/PEO<sub>45</sub>-b-PMAA<sub>81</sub> (T5, grey symbols, A), PMAA<sub>46</sub>/PEO<sub>114</sub>-b-PMAA<sub>81</sub> (T6, purple symbols, B), PEO<sub>45</sub>-b-PMAA<sub>15</sub>/PEO<sub>45</sub>-b-PMAA<sub>81</sub> (T7, orange symbols, C), and PEO<sub>45</sub>-b-PMAA<sub>15</sub>/PEO<sub>114</sub>-b-PMAA<sub>81</sub> (T8, yellow symbols, D). The

complete polymer molar fraction set  $0 \leq \Psi \leq 1$  was investigated and fitted with the fuzzy-surface C3M model, while for visibility reasons only a couple of SAXS patterns are shown. The fit parameter  $R_{tot}$  is shown for T5, T6, T7, and T8 along the complete polymer molar fraction set (E).

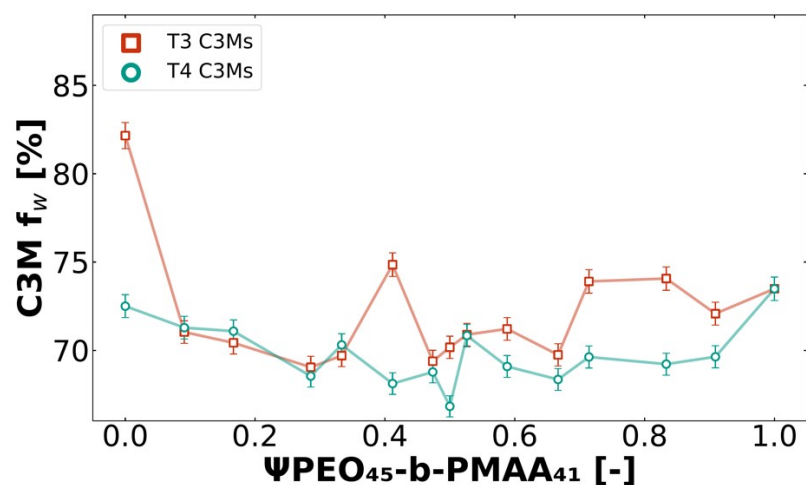

**Figure S2.** From the fuzzy-surface C3M model fits, the C3M water content ( $f_w$ ) was plotted against the molar fraction of  $PEO_{45}\text{-}b\text{-}PMAA_{41}$  (T3, red squares and T4, green circles).

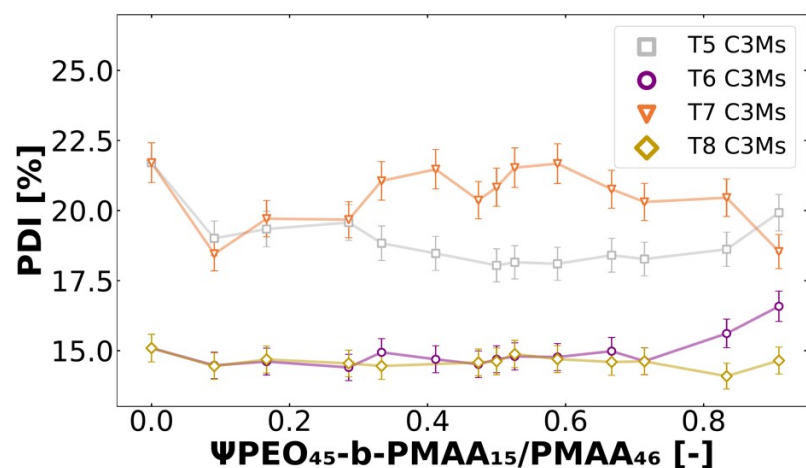

**Figure S3.** Polydispersity index ( $PDI$ ) behaviour for T5 (grey squares), T6 (purple circles), T7 (orange triangles), and T8 (yellow rhombuses) ternary colistin complex coacervate systems for the complete polymer molar fraction set ( $0 \leq \Psi \leq 1$ ). From the fuzzy-surface C3M model fits, the  $PDI$  values were plotted against the molar fraction of either  $PEO_{45}\text{-}b\text{-}PMAA_{15}$  or  $PMAA_{46}$ .

### 2.3. Formation kinetics of ternary coacervate systems

In Figure S4, the power law behaviour of T1-T4 ternary coacervate systems for  $R_{tot}$  and  $P$  (from the fuzzy-surface complex coacervate model) is shown from the kinetic growth process over time, analysed with a TR-SAXS setup at 0.125 wt% and  $\Psi = 0.50$ .

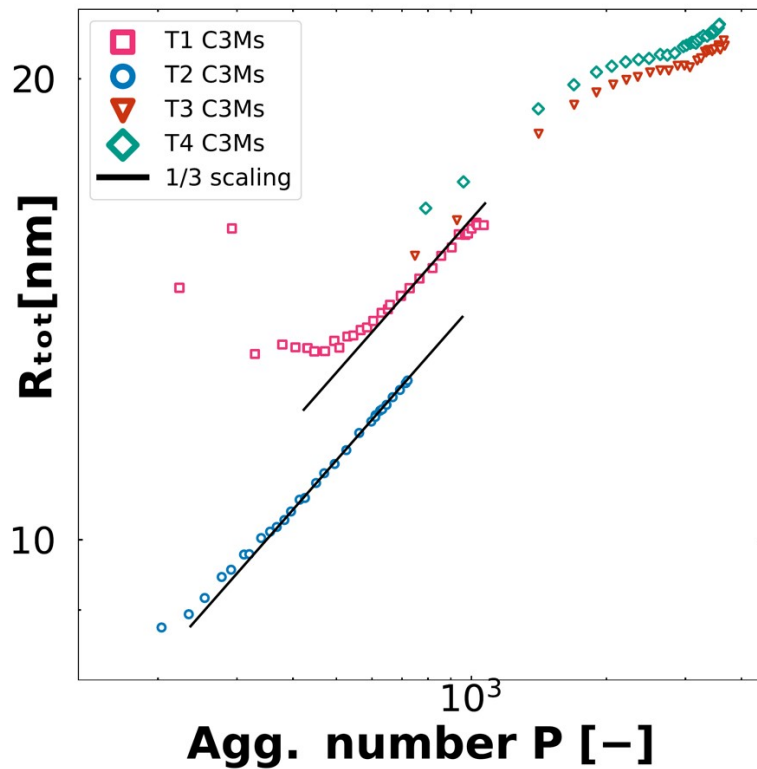

**Figure S4.** Power law relation of  $R_{tot}$  and  $P$  on log-log scale for colistin-C3Ms from T1 (pink squares), T2 (blue circles), T3 (red triangles) and T4 (green rhombuses) analysed through TR-SAXS, including fits from the fuzzy-surface complex coacervate model. 1/3 fits for the first two are added to visualise the power law of equal density growth. We observe some density changes in the growth process of complex coacervates.

### 3. References

- 1 W. Burchard, K. Kajiwara and D. H. Whiffen, *Proc. R. Soc. Lond. Math. Phys. Sci.*, 1997, **316**, 185–199.
- 2 Y. N. Fang, A. M. Rumyantsev, A. E. Neitzel, H. Liang, W. T. Heller, P. F. Nealey, M. V. Tirrell and J. J. de Pablo, *Proc. Natl. Acad. Sci.*, 2023, **120**, e2302151120.
- 3 T. D. Vogelaar, A. E. Agger, J. E. Reseland, D. Linke, H. Jenssen and R. Lund, *Biomacromolecules*, 2024, **25**, 4267–4280.
- 4 I. Berndt, J. S. Pedersen, P. Lindner and W. Richtering, *Langmuir*, 2006, **22**, 459–468.
- 5 I. Berndt, J. S. Pedersen and W. Richtering, *Angew. Chem.*, 2006, **118**, 1769–1773.
- 6 P. Debye, *J. Phys. Colloid Chem.*, 1947, **51**, 18–32.
